# Supplementary material
Source: PubMed Central journal article supplement (PMC2396889)
Supplement: JCI0833777sd.pdf [file JCI0833777sd.pdf]

|                    | B-chain                                         | C - peptide                                   | A-chain                               |
|--------------------|-------------------------------------------------|-----------------------------------------------|---------------------------------------|
| Homo Sapiens       | FVNQH <b>CGSH</b> VEALYLV <b>GERGFFY</b> TPKT-  | REAEDLQVGQVELGGGPGAGSLQPLALEGS--LQ <b>KR</b>  | <b>GIVEQCC</b> TSI <b>CSLYQLENYCN</b> |
| Rattus Norvegicus  | FVKQH <b>CGSH</b> VEALYLV <b>GERGFFY</b> TPMS-  | REVEDPQVAQLELGGGPGAGDLQTLALEVA--RQ <b>KR</b>  | <b>GIVDQCC</b> TSI <b>CSLYQLENYCN</b> |
| Mus Musculus       | FVKQH <b>CGPH</b> VEALYLV <b>GERGFFY</b> TPKS-  | REVEDPQVEQLELGGSP--GDLQTLALEVA--RQ <b>KR</b>  | <b>GIVDQCC</b> TSI <b>CSLYQLENYCN</b> |
| Gallus Gallus      | --NQH <b>CGSH</b> VEALYLV <b>GERGFFY</b> SPKA-  | RDVEQPLVSSPLRG---EAGVLPFQQEYE--KV <b>KR</b>   | <b>GIVEQCCH</b> NT <b>CSLYQLENYCN</b> |
| Xenopus Tropicalis | --NQH <b>CGSH</b> VEALYLV <b>GD</b> RGFFYYPKI-  | KRDIEQAMVNGPQDN---ELDGMQLQPQEQ--KM <b>KR</b>  | <b>GIVEQCCH</b> ST <b>CSLFQLESYCN</b> |
| Danio Rerio        | --SQH <b>CGSS</b> VDALYLV <b>GP</b> RGFFYTNRG-  | RDLETLLALLSNLAGYEAADA-DPLKEKVM--KM <b>KR</b>  | <b>GIVEQCCH</b> RPCTIYH <b>LEDYCS</b> |
| Myxine Glutinosa   | ----H <b>CGKD</b> LVNALYI <b>AG</b> VRGFFYDPTKM | KRDTGALAAFLPLAYAEDNESQDDESIGINEVLK <b>SKR</b> | <b>GIVEQCCH</b> KR <b>CSIYDLENYCN</b> |

- |                                                 |                                                                                                                                          |                                                                                       |                                                                                   |
|-------------------------------------------------|------------------------------------------------------------------------------------------------------------------------------------------|---------------------------------------------------------------------------------------|-----------------------------------------------------------------------------------|
| ● Kindred A (nd-PS/ $\wedge$ )<br>R $\wedge$ =C | ● Kindred C (nd-VI/ $\wedge$ )<br>R $\wedge$ =C                                                                                          | ● Kindred E (nd-PD/ $\wedge$ )<br>L $\wedge$ <sup>B<math>\wedge</math></sup> P        | ● Kindred H (nd-CO-LE/ $\wedge$ )<br>L $\wedge$ <sup>B<math>\wedge</math></sup> P |
| ■ Kindred B (nd-FI/ $\wedge$ )<br>R $\wedge$ =C | ■ Kindred D (nd-BO/ $\wedge$ )<br>L $\wedge$ <sup>B<math>\wedge</math></sup> $\gamma$ B $\wedge$ <sup>B<math>\wedge</math></sup> delinsH | ■ Kindred F (nd-PI/ $\wedge$ )<br>C $\wedge$ <sup>A<math>\wedge</math></sup> $\gamma$ | ■ Kindred I (nd-NO/ $\wedge$ )<br>L $\wedge$ <sup>B<math>\wedge</math></sup> V    |

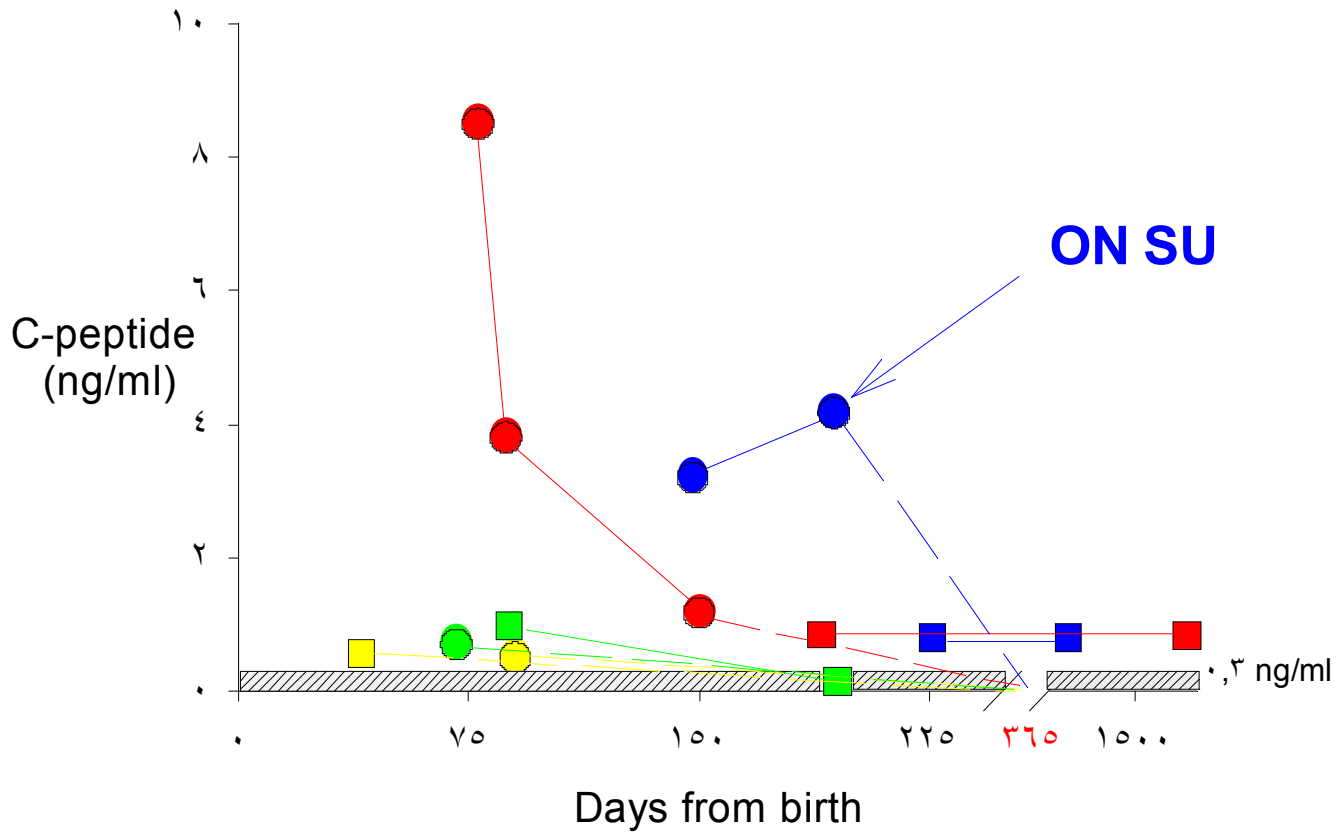

Supplemental figure 1. Insulin sequences from homo sapiens down to mixine glutinosa (hagfish) are aligned. In red: invariant residues. Invariant cysteines are highlighted in dark blue. Leucines in position 6 and 11 of the human insulin b-chain, found mutated in patients with PNDM-MDI, are highlighted in bright green.

Supplemental figure 2. C-peptide levels in patients with PNDM-MDI from the diagnosis of diabetes and the following months. This figure shows in a graphical form the data reported in Table 1. Please note that the second c-peptide determination of kindred H has been performed while the patient was on treatment with sulfonylurea (SU).
